# Supplementary material for: Dynamics of antimicrobial resistance in intestinal Escherichia coli from children in community settings in South Asia and sub-Saharan Africa
Source: PubMed Central journal article supplement (PMC6787116; doi:10.1038/s41564-018-0217-4), 2018-08-20
Supplement: 41564_2018_217_MOESM1_ESM.pdf [file 41564_2018_217_MOESM1_ESM.pdf]

In the format provided by the authors and unedited.

# Dynamics of antimicrobial resistance in intestinal *Escherichia coli* from children in community settings in South Asia and sub-Saharan Africa

Danielle J. Ingle<sup>1,2,6,7</sup>, Myron M. Levine<sup>3</sup>, Karen L. Kotloff<sup>3</sup>, Kathryn E. Holt <sup>2,4,8</sup> and Roy M. Robins-Browne <sup>5,8\*</sup>

---

<sup>1</sup>Department of Microbiology and Immunology, Peter Doherty Institute for Infection and Immunity, The University of Melbourne, Melbourne, Victoria, Australia. <sup>2</sup>Department of Biochemistry and Molecular Biology, Bio21 Molecular Science and Biotechnology Institute, The University of Melbourne, Melbourne, Victoria, Australia. <sup>3</sup>Departments of Pediatrics and Medicine, Center for Vaccine Development, University of Maryland School of Medicine, Baltimore, MD, USA. <sup>4</sup>London School of Hygiene and Tropical Medicine, London, UK. <sup>5</sup>Murdoch Children's Research Institute, Royal Children's Hospital, Parkville, Victoria, Australia. <sup>6</sup>Present address: National Centre for Epidemiology and Population Health, Research School of Population Health, The Australian National University, Canberra, Australian Capital Territory, Australia. <sup>7</sup>Present address: Microbiological Diagnostic Unit Public Health Laboratory, Department of Microbiology and Immunology, Peter Doherty Institute for Infection and Immunity, The University of Melbourne, Melbourne, Victoria, Australia. <sup>8</sup>These authors contributed equally to this work: Kathryn E. Holt, Roy M. Robins-Browne. \*e-mail: [r.browne@unimelb.edu.au](mailto:r.browne@unimelb.edu.au)

**Dynamics of antimicrobial resistance in intestinal *Escherichia coli* from children in  
community settings in South Asia and sub-Saharan Africa**

Danielle J. Ingle, Myron M. Levine, Karen L. Kotloff,

Kathryn E. Holt and Roy M. Robins-Browne

**Supplementary Note**

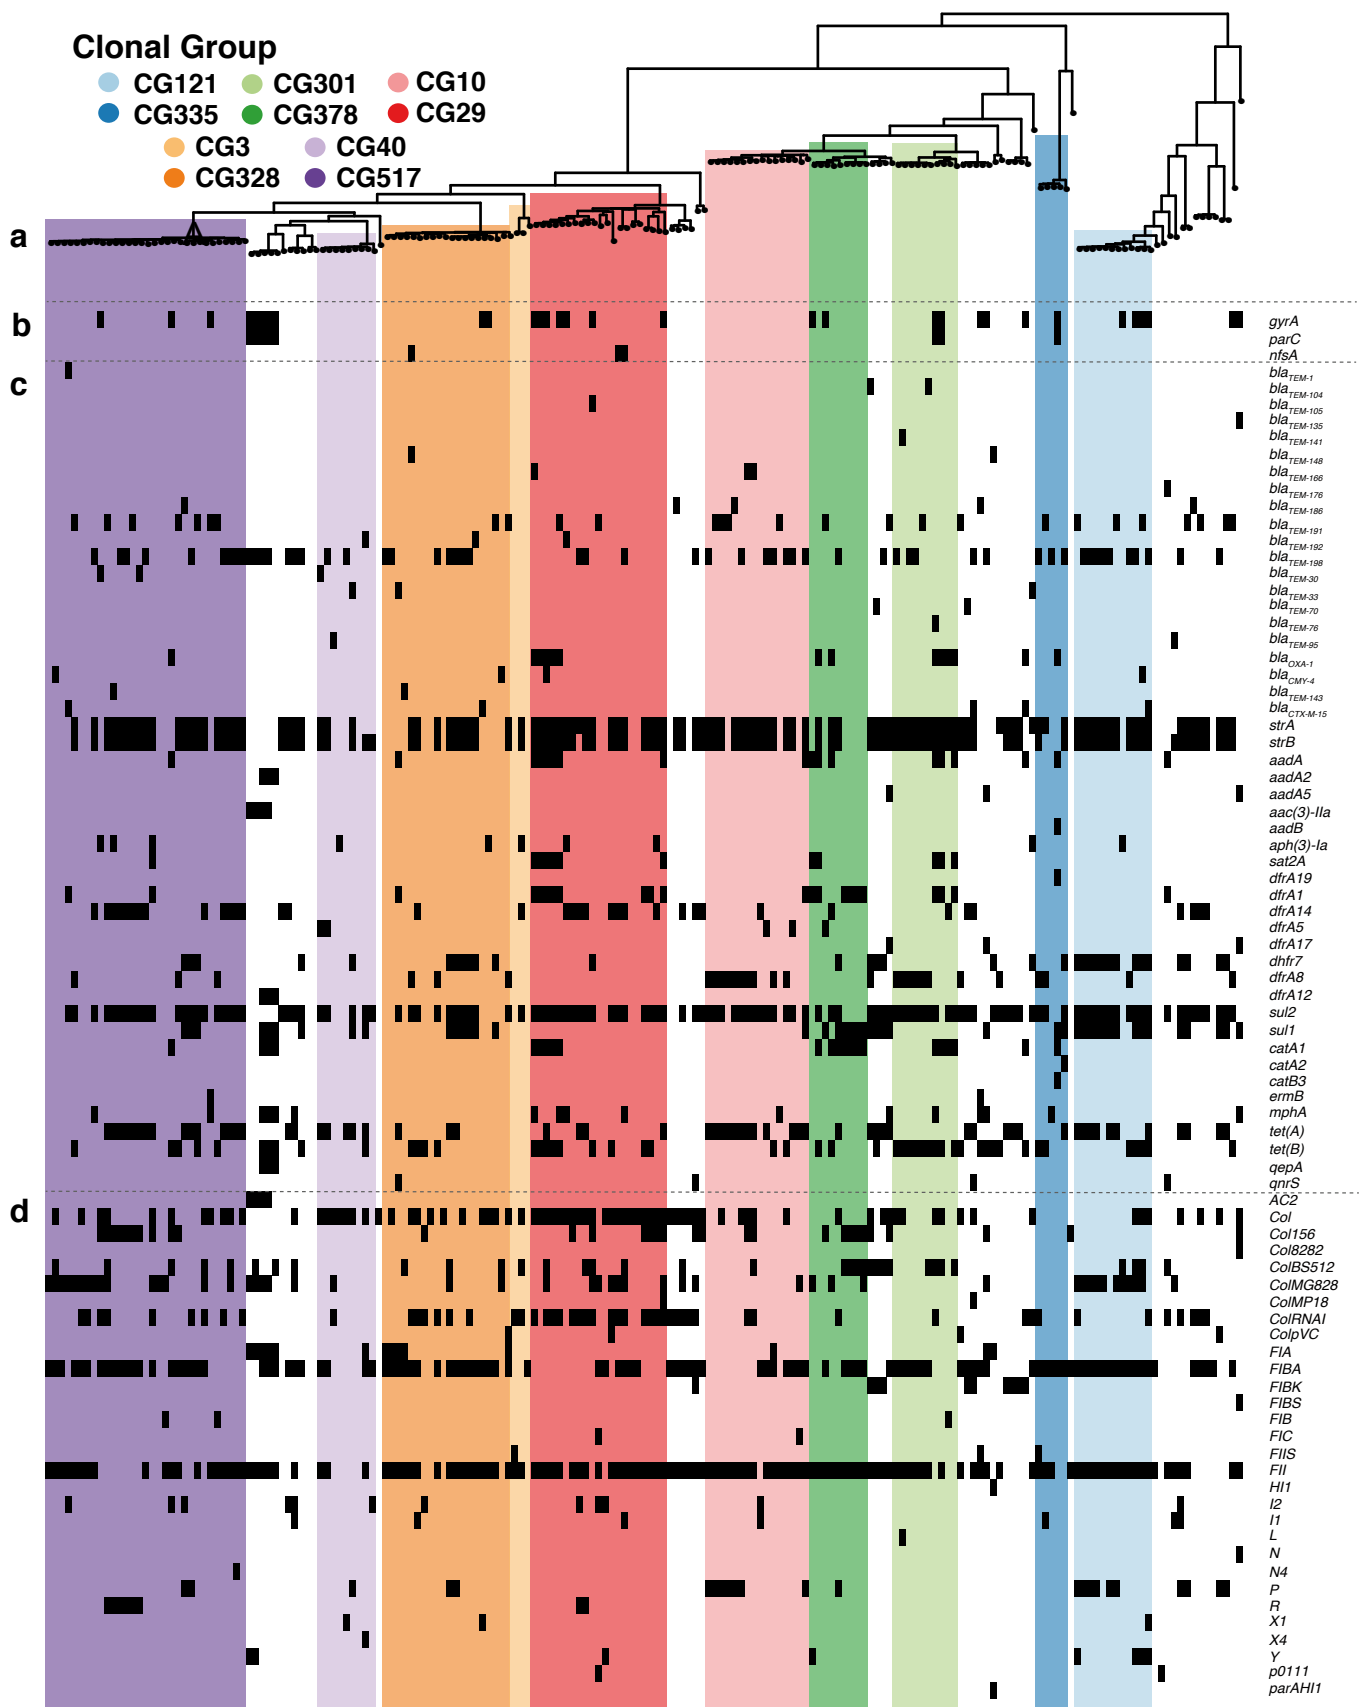

**Supplementary Figure 1. Presence of common acquired antimicrobial resistance (AMR) genes and plasmid replicon genes in the GEMS aEPEC population.** (a) The population structure of 185 EPEC isolates is shown at the top of the figure (sub-setted from core chromosomal phylogeny, see Methods). The ten common aEPEC clonal groups (CG) are depicted by different colours, as per the inset colour key. The presence of AMR genetic determinants are plotted as a binary heatmap with black indicating the presence within each bacterial genome of: (b) point mutations associated with AMR, (c) genes associated with AMR acquired by horizontal gene transfer, and (d) plasmid replicon genes.



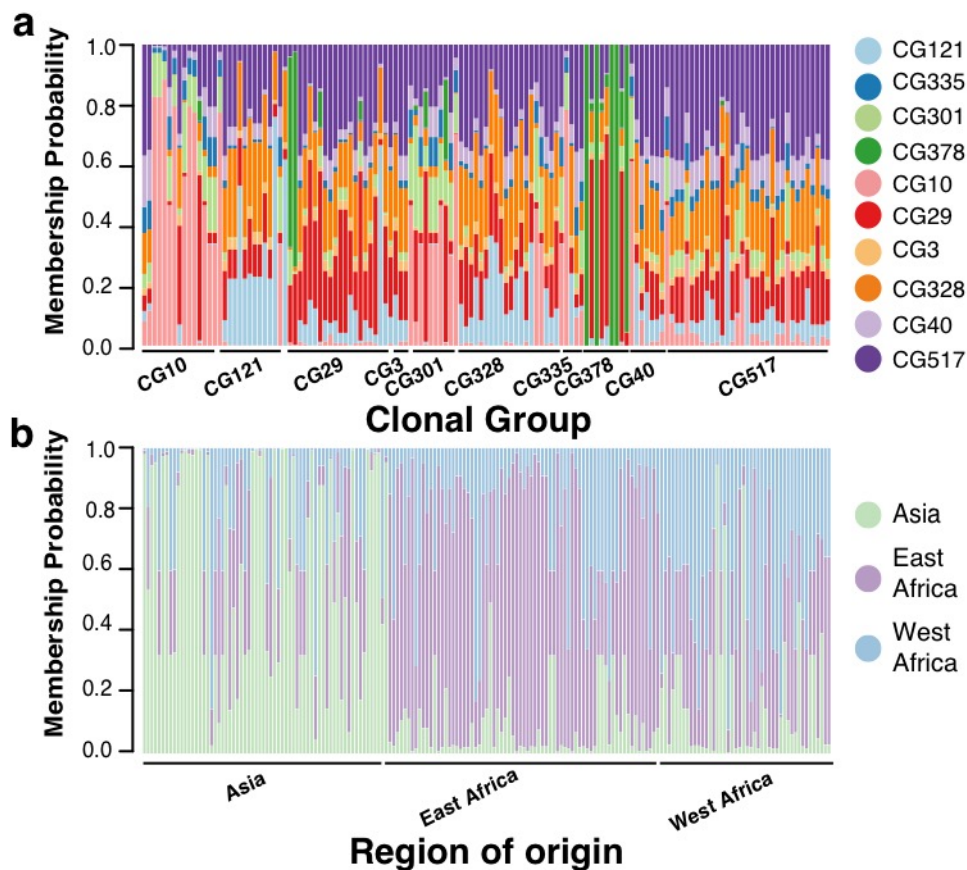

**Supplementary Figure 3. Discriminant analysis of principal components (DAPC) group membership probabilities, indicating discrimination of isolates into groups on the basis of the AMR gene content matrix.** Groupings subjected to DAPC analysis were (a) clonal groups (CG) (n = 137), and (b) region of origin (n = 185). Each vertical line represents a single isolate, and the colours indicate the probability of assignment to each of the possible groups based on the isolate's AMR gene profile.

## Supplementary Tables

**The following tables are included with this file:**

**Supplementary Table 2:** MIC breakpoint values used to determine phenotypic resistance

**Supplementary Table 5:** Predictive power of AMR-associated genotypes for AMR phenotypes for 185 aEPEC

**Supplementary Table 6:** Frequency of antimicrobial resistance by drug class, stratified by confirmed diseases status (n= 182)

**The tables listed below are in separate xlsx files available for download:**

**Supplementary Table 1.** Details of 185 isolates of atypical enteropathogenic *E. coli* analysed in this study.

**Supplementary Table 3.** Antimicrobial susceptibility profiles of all isolates, inferred from VITEK and agar plate dilution methods.

**Supplementary Table 4.** Presence/absence of point mutations, acquired antimicrobial resistance (AMR) genes and plasmid replicon genes in all isolates.

**Supplementary Table 7.** MIC data from VITEK2 for 185 isolates of atypical enteropathogenic *E. coli* (aEPEC).

**Supplementary Table 2: MIC breakpoint values used to determine phenotypic resistance**

| Antimicrobial                     | Method                    | MIC breakpoint | Susceptible ≤ (µg/mL) | Intermediate (µg/mL) | Resistant > (µg/mL) |
|-----------------------------------|---------------------------|----------------|-----------------------|----------------------|---------------------|
| <b>Beta-Lactam</b>                |                           |                |                       |                      |                     |
| Ampicillin                        | VITEK2                    | EUCAST         | 8                     | NA*                  | 8                   |
| Ceftazidime                       | VITEK2                    | EUCAST         | 1                     | 4                    | 4                   |
| Ceftriaxone                       | VITEK2                    | EUCAST         | 1                     | 2                    | 2                   |
| Cefepime                          | VITEK2                    | EUCAST         | 1                     | 4                    | 4                   |
| Meropenem                         | VITEK2                    | EUCAST         | 2                     | 8                    | 8                   |
| <b>Aminoglycoside</b>             |                           |                |                       |                      |                     |
| Streptomycin ^                    | Agar-dilution (16 µg/mL ) | Neither        | 8                     | NA                   | ≥16                 |
| Gentamicin                        | VITEK2                    | EUCAST         | 2                     | 4                    | 4                   |
| Tobramycin                        | VITEK2                    | EUCAST         | 2                     | 4                    | 4                   |
| Amikacin                          | VITEK2                    | EUCAST         | 8                     | 16                   | 16                  |
| <b>Folate Pathway Inhibitors</b>  |                           |                |                       |                      |                     |
| Trimethoprim                      | VITEK2                    | EUCAST         | 2                     | 4                    | 4                   |
| Trimethoprim/sulphamethoxazole ^^ | VITEK2                    | EUCAST         | 2                     | 4                    | 4                   |
| <b>Nitrofurantoin</b>             |                           |                |                       |                      |                     |
| Nitrofurantoin                    | VITEK2                    | EUCAST         | 64                    | NA                   | 64                  |
| <b>Chloramphenicol</b>            |                           |                |                       |                      |                     |
| Chloramphenicol                   | Agar-dilution (16 µg/mL ) | EUCAST         | 8                     | NA                   | 8                   |
| <b>Macrolides</b>                 |                           |                |                       |                      |                     |
| Azithromycin^                     | Agar-dilution (16 µg/mL ) | Neither        | 8                     | NA                   | ≥16                 |
| <b>Tetracyclines</b>              |                           |                |                       |                      |                     |
| Tetracycline #                    | Agar-dilution (8 µg/mL )  | CLSI           | 4                     | 8                    | 16                  |
| <b>Fluoroquinolones</b>           |                           |                |                       |                      |                     |
| Ciprofloxacin                     | VITEK2                    | EUCAST         | 0.5                   | 1                    | 1                   |
| Norfloxacin                       | VITEK2                    | EUCAST         | 0.5                   | 1                    | 1                   |

\* NA, not applicable

^ The breakpoint for *E. coli* is uncertain and is not provided by EUCAST or CLSI. A resistance breakpoint of MIC 16 µg/mL was used in keeping with that used for *Salmonella enterica*.

^^ Ratio of 1:19 used for trimethoprim:sulphamethoxazole

# CLSI cut-off used as no MIC breakpoint given under EUCAST. Intermediate and resistant phenotyp



| <b>Supplementary Table 5: Predictive power of AMR-associated genotypes for AMR phenotypes for 185 aEPEC</b> |                             |                             |                     |                     |  |
|-------------------------------------------------------------------------------------------------------------|-----------------------------|-----------------------------|---------------------|---------------------|--|
| <b>Antimicrobial</b>                                                                                        | <b>Sensitivity (95% CI)</b> | <b>Specificity (95% CI)</b> | <b>PPV (95% CI)</b> | <b>NPV (95% CI)</b> |  |
| <b>Beta-lactam</b>                                                                                          |                             |                             |                     |                     |  |
| Ampicillin                                                                                                  | 0.93 (0.86 - 0.97)          | 0.80 (0.68 - 0.89)          | 0.90 (0.83 - 0.94)  | 0.85 (0.73 - 0.93)  |  |
| Cefepime                                                                                                    | 1 (0.29 - 1)                | 0.98 (0.94 - 0.99)          | 0.43 (0.1 - 0.82)   | 1 (0.98 - 1)        |  |
| Ceftazidime                                                                                                 | 1 (0.54 - 1)                | 0.97 (0.94 - 0.99)          | 0.55 (0.23 - 0.83)  | 1 (0.98 - 1)        |  |
| Ceftioxone                                                                                                  | 1 (0.54 - 1)                | 0.97 (0.94 - 0.99)          | 0.55 (0.23 - 0.83)  | 1 (0.98 - 1)        |  |
| Meropenem                                                                                                   | NA                          | 1 (0.98 - 1)                | NA                  | 1 (0.98 - 1)        |  |
| <b>Aminoglycoside</b>                                                                                       |                             |                             |                     |                     |  |
| Streptomycin                                                                                                | 0.95 (0.88 - 0.99)          | 0.53 (0.43 - 0.63)          | 0.61 (0.52 - 0.69)  | 0.93 (0.84 - 0.98)  |  |
| Gentamicin                                                                                                  | 1 (0.48 - 1)                | 1 (0.98 - 1)                | 1 (0.48 - 1)        | 1 (0.98 - 1)        |  |
| Tobramycin                                                                                                  | 1 (0.48 - 1)                | 1 (0.98 - 1)                | 1 (0.48 - 1)        | 1 (0.98 - 1)        |  |
| Amikacin                                                                                                    | NA                          | 1 (0.98 - 1)                | NA                  | 1 (0.98 - 1)        |  |
| <b>Folate Pathway Inhibitor</b>                                                                             |                             |                             |                     |                     |  |
| Trimethoprim                                                                                                | 0.97 (0.92 - 0.99)          | 0.82 (0.7 - 0.91)           | 0.92 (0.85 - 0.96)  | 0.93 (0.82 - 0.98)  |  |
| Trimethoprim/Sulphonamide                                                                                   | 0.97 (0.92 - 0.99)          | 0.84 (0.73 - 0.92)          | 0.92 (0.86 - 0.96)  | 0.93 (0.83 - 0.98)  |  |
| <b>Nitrofurantoin</b>                                                                                       |                             |                             |                     |                     |  |
| Nitrofurantoin                                                                                              | NA                          | 0.98 (0.95 - 1)             | 0 (0 - 0.71)        | 1 (0.98 - 1)        |  |
| <b>Chloramphenicol</b>                                                                                      |                             |                             |                     |                     |  |
| Chloramphenicol                                                                                             | 0.9 (0.7 - 0.99)            | 0.98 (0.94 - 0.99)          | 0.83 (0.61 - 0.95)  | 0.99 (0.96 - 1)     |  |
| <b>Macrolides</b>                                                                                           |                             |                             |                     |                     |  |
| Azithromycin                                                                                                | 0.85 (0.55 - 0.98)          | 0.97 (0.93 - 0.99)          | 0.65 (0.38 - 0.86)  | 0.99 (0.96 - 1)     |  |
| <b>Tetracyclines</b>                                                                                        |                             |                             |                     |                     |  |
| Tetracycline                                                                                                | 0.96 (0.9 - 0.99)           | 0.9 (0.81 - 0.96)           | 0.93 (0.86 - 0.97)  | 0.95 (0.87 - 0.99)  |  |
| <b>Fluoroquinolone</b>                                                                                      |                             |                             |                     |                     |  |
| Ciprofloxacin                                                                                               | 1 (0.63 - 1)                | 0.98 (0.94 - 0.99)          | 0.67 (0.35 - 0.9)   | 1 (0.98 - 1)        |  |
| Norfloxacin                                                                                                 | 0.97 (0.83 - 1)             | 0.97 (0.93 - 0.99)          | 0.86 (0.7 - 0.95)   | 0.99 (0.96 - 1)     |  |

Point estimates for Sensitivity, Specificity, Positive Predictive Value (PPV) and Negative Predictive Value (NPV) with 95% confidence intervals

NA, not applicable

Supplementary Table 6: Frequency of antimicrobial resistance by drug class, stratified by confirmed diseases status (n= 182)

| Drug Class                  | Phenotypic resistance |                   |                               |                     | Resistance predicted from genotype |                   |                               |                     |
|-----------------------------|-----------------------|-------------------|-------------------------------|---------------------|------------------------------------|-------------------|-------------------------------|---------------------|
|                             | % Cases (n=94)        | % Controls (n=88) | P-value (Fisher's exact test) | Odds Ratio [95% CI] | % Cases (n=94)                     | % Controls (n=88) | P value (Fisher's exact test) | Odds Ratio [95% CI] |
| Ampicillin                  | 71.3                  | 60.2              | 0.1                           | 0.6 [0.3-1.2]       | 73.4                               | 62.5              | 0.2                           | 0.6 [0.3-1.2]       |
| 3rd-4th gen. cephalosporins | 3.2                   | 2.3               | 1                             | 0.7 [0.1-6.3]       | 6.4                                | 4.5               | 0.7                           | 0.7 [0.1-3.1]       |
| Meropenem                   | 0.0                   | 0.0               | -                             | -                   | 0.0                                | 0.0               | -                             | -                   |
| Aminoglycoside              | 46.8                  | 45.5              | 0.9                           | 0.9 [0.5-1.8]       | 72.3                               | 76.1              | 0.6                           | 1.2 [0.6-2.5]       |
| Amikacin                    | 0.0                   | 0.0               | -                             | -                   | 0.0                                | 0.0               | -                             | -                   |
| Trimethoprim                | 68.1                  | 64.8              | 0.6                           | 0.9 [0.4-1.7]       | 72.3                               | 68.2              | 0.6                           | 0.8 [0.4-1.6]       |
| Trimethoprim/Sulphonamide   | 67.0                  | 63.6              | 0.6                           | 0.9 [0.4-1.7]       | 72.3                               | 71.6              | 1                             | 1 [0.5-1.9]         |
| Nitrofurantoin              | -                     | -                 | -                             | -                   | 1.1                                | 2.3               | 0.6                           | 2.2 [0.1-128.8]     |
| Chloramphenicol             | 16.0                  | 6.8               | 0.1                           | 0.4 [0.1-1.1]       | 17.0                               | 8.0               | 0.1                           | 0.4 [0.1-1.2]       |
| Macrolide                   | 8.5                   | 5.7               | 0.6                           | 0.6 [0.2-2.4]       | 8.5                                | 10.2              | 0.8                           | 1.2 [0.4-3.8]       |
| Tetracyclines               | 52.1                  | 60.2              | 0.3                           | 1.4 [0.7-2.6]       | 55.3                               | 61.4              | 0.5                           | 1.3 [0.7-2.4]       |
| Fluoroquinolones            | 19.1                  | 13.6              | 0.4                           | 0.7 [0.3-1.6]       | 19.1                               | 18.2              | 1                             | 0.9 [0.4-2.1]       |
